# Supplementary material for: Amyloid Fibrils Produced by Streptococcus sanguinis Contribute to Biofilm Formation and Immune Evasion
Source: MDPI journal article supplement (doi:10.3390/ijms242115686), 2023-10-28
Supplement: s1 [file s1]

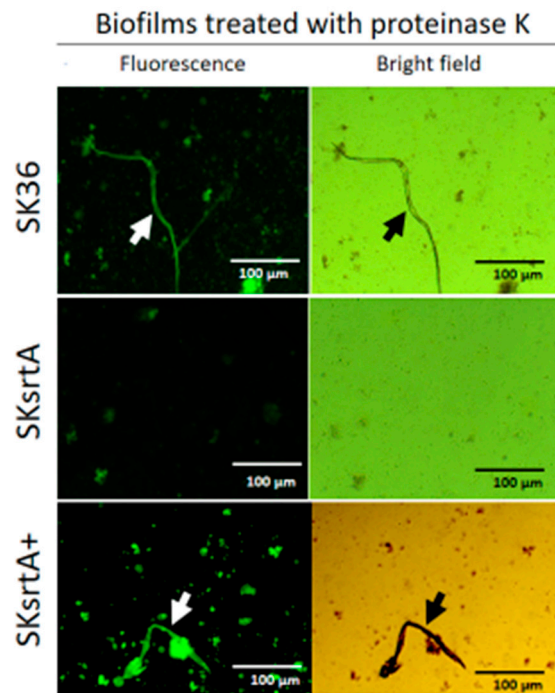

**Figure S1.** Fluorescence microscopy analysis of *S. sanguinis* biofilms stained with ThT. Biofilms formed over 72 h by strains SK36, SKsrtA and SKsrtA+ in CDM supplemented with 1% sucrose were collected, treated with proteinase K and stained with ThT. Representative images of the biofilms observed by fluorescence (left panels) and light (right panels) microscopy are shown. Arrows indicate amyloid-like aggregates. Digital images were acquired using a fluorescence microscope (Zeiss Axiovert 40CFL) at 200X total magnification. Strain identities are indicated on the left of the respective panels.
